**Title: Guiding principles for accelerating change through health inequities research and practice: A modified Delphi consensus process**

**Short Title: Guiding principles for health inequalities research and practice**

Ahmed, F.<sup>1</sup>, Woodhead, C.<sup>1,2</sup>, Hossaini, A.<sup>3</sup>, Stanley, N.<sup>1</sup>, Ensum, L.<sup>1</sup>, Rhead, R.<sup>1,2</sup>, Onwumere, J.<sup>4</sup>, Mir, G.<sup>5</sup>, Dyer, J.<sup>6</sup>, HSE Collective., Hatch, S.L.<sup>1,2</sup><sup>□</sup>

1 Department of Psychological Medicine, Institute of Psychiatry, Psychology & Neuroscience, King's College London, London, UK

2 ESRC Centre for Society and Mental Health, Institute of Psychiatry, Psychology & Neuroscience, King's College London, London, UK

3 Department of Engineering, Faculty of Natural, Mathematical & Engineering Sciences, King's College London, London, UK

4 Department of Psychology, Institute of Psychiatry, Psychology & Neuroscience, King's College London, London, UK

5 Leeds Institute of Health Sciences, School of Medicine, The University of Leeds, Leeds, UK.

6 Black Thrive Global, London, UK

<sup>□</sup> Corresponding author: Dr Rebecca Rhead, Institute of Psychiatry, Psychology & Neuroscience (IoPPN), 16 De Crespigny Park, London, SE5 8AB. E-mail: [Rebecca.rhead@kcl.ac.uk](mailto:Rebecca.rhead@kcl.ac.uk)

## 1 **Abstract**

2 Despite a preponderance of evidence, and considerable resources, health & social inequities persist and  
3 there is evidence of widening unfair differences in markers of health and care. While power imbalances  
4 created by broader structural and economic systems are major influencing factors, reform within health  
5 inequities research, policy and health and social care practice is key to both bottom-up and top-down  
6 change. We aimed to develop agreement for an iterative set of guiding principles underpinning ways of  
7 working for a newly formed Health and Social Equity Collective comprising researchers, community  
8 leaders, policymakers, and health and care professionals, seeking to address inequity by identifying and  
9 engaging the levers of change within and across institutions. The principles aim to inform a more  
10 inclusive and translational knowledge base through research practices, tackling entrenched inequalities  
11 in education, training, and capacity-building; and centring communities affected by health inequities  
12 through engagement and advocacy. We carried out a modified Delphi consensus process between  
13 March and September 2022 with Collective members and networks through online workshops and  
14 surveys. Out of 24 consensus statements developed and refined over a workshop and three successive  
15 survey rounds, we identified eleven key principles agreed upon by a majority of respondents. Two of  
16 these were rated high priority by over 75% of respondents, four by over 60% and five by over 50%.  
17 These could be grouped into three main topics detailing ways of working and change needed within:  
18 'Knowledge and framing of health and social inequities, and incorporation into practice', 'Community  
19 engagement, involvement and peer research', and 'Organisational culture change'. Given the pressing  
20 need to address inequities, these principles offer a grounding for future consensus building initiatives  
21 which also incorporate a wider diversity of perspectives, and which should be iteratively updated with  
22 ongoing learning from health equity initiatives nationally and internationally.

## 23 **Introduction**

24 There is an urgent need to accelerate the pace of change in tackling health inequities. For over 20 years,  
25 there has been a focus on identifying and tackling health and social inequities in research and  
26 policymaking in the UK. However, such inequities persist and are widening [1-3], exacerbated by the  
27 COVID-19 pandemic [4]. Translation of the vast industry of health inequalities research into practice is  
28 limited at best, self-serving at worst [5,6]. In research and policymaking, current ways of working and of  
29 training the next generation across disciplines and sectors contribute to this stagnation, being inherently  
30 fraught with inequities and fragmented approaches [7-9].

31 Across research, education, policy, public health, and healthcare sectors, there has been an  
32 overwhelming focus on inequalities (i.e., unequal distribution of health and social outcomes), despite an  
33 amassing of evidence highlighting a lack of attention to the existing and emerging inequities (i.e.,  
34 injustices) experienced by groups within and across institutions and systems [10-12]. Notably, the focus  
35 on social determinants and on individualised behaviour change approaches have paid little attention to  
36 the main systematic and institutionalised drivers and processes generating, maintaining, legitimising,  
37 and perpetuating inequities, such as racism, xenophobia and all forms of discrimination [13-15]. These  
38 are experienced, anticipated and witnessed across the life course in different domains, including health,  
39 education and research institutions [16]. Moreover, while much deficit-based work has examined the  
40 experience of marginalisation on health and well-being, there has been very little acknowledgment of  
41 the impact of privilege in creating, maintaining and perpetuating health inequalities [17]. Similarly, a lack  
42 of consideration of the impact of norms, behaviours, laws, processes enacted inter/intra-personally,  
43 organisationally and structurally which maintain advantage among individuals and groups benefitting  
44 from the status quo persists [18,19].

45 By actively disrupting predominant power structures, 'empowering' those affected by health inequities  
46 through participation and involvement in research and decision-making is increasingly viewed as a key  
47 mechanism of change [20,21]. However, approaches such as 'coproduction' and 'community

48 engagement' in research and practice often fail to achieve the empowerment required for systems  
49 change [21-23]. There is a need for more equitable and adequately resourced approaches to  
50 engagement which facilitates capacity and relationship building between organisations and community  
51 groups affected by health inequalities; spaces for dialogue which explicitly and sensitively attend to  
52 power differentials; institutional culture shifts which valorise community voice; and, transparent  
53 acknowledgement of historic and contemporary abuses of power which inhibit trust [21,23,24]. The  
54 coproduced Patient and Carer Race Equality Framework (PCREF), launched as the NHS' first anti-racism  
55 framework, is one example of a nationwide participatory approach to tackle mental health inequities,  
56 which has community engagement at its core.

57 Health inequities are also shaped by wider structural social and economic forces; however, processes  
58 and practices in research, education, health and social care form part of the system maintaining health  
59 inequities in place. There is a need to develop shared agreement on best practice principles for how to  
60 initiate alternative, sustainable, and interdisciplinary ways of working and ideological shifts to help  
61 tackle the structures which perpetuate inequities in what gets researched, whose voices are heard, how  
62 training and career pipelines are navigated and what evidence is valued [8]. As we note, structural  
63 inequity relies on political, economic and ideological forces which outmass the sectors we represent.  
64 Thus, we aim to change what we can within our domain while searching for points where we influence  
65 broader social currents.

66 As a foundation for facilitating such changes in our work we formed the Health and Social Equity  
67 Collective ([www.hsecollective.org](http://www.hsecollective.org)) in November 2021, a group of leading interdisciplinary researchers in  
68 the field of health equity, community advocates, policy makers, health and social care professionals and  
69 voluntary and community sector organisations with the goal of accelerating the pace of change in  
70 tackling health inequalities. The composition of the Collective supported a focus on a broad range of  
71 socially excluded groups (e.g., migrant, racialised, religious minority, sexual and gender minority groups,

72 people with mental ill health, learning disabilities and disabled people), as well as research approaches.  
73 The first phase of the HSE Collective was an extensive co-design process, during which we developed our  
74 priorities, ways of working and public facing resources. As part of the co-design phase, we conducted a  
75 modified Delphi exercise which aimed to incorporate the perspectives of people affected by, and  
76 working to address, health inequities to build consensus about how best to change the way we work and  
77 collaborate to achieve those broader aims across three domains: 1) research, 2) training and capacity  
78 building, and 3) engagement and advocacy.

## 79 **Methods**

80 Ethical approval was obtained 15<sup>th</sup> February 2022 from the King's College London PNM Research Ethics  
81 Panel, reference: RS/DP-21/22-28451.

### 82 *Convening the collaborators*

83 We undertook a modified online Delphi consensus building process [25] in line with previous approaches  
84 within health and social care research [26-28]. A diverse group of collaborators was formed in  
85 November 2021 (HSE Collective) with the first workshop being held a month later. Ethics were granted  
86 on February 15<sup>th</sup>, 2022, and the first round of consensus building began on March 1<sup>st</sup>, 2022. This was a  
87 way of integrating geographically disparate expert perspectives (including lived experience) on key areas  
88 for change in practice across the research, training and capacity building, and engagement and advocacy  
89 domains through successive rounds of prioritisation, rating and iterative refinement of a series of  
90 statements. An outline of the approach is detailed in Table 1 below, following that conducted by Mir et  
91 al. [27].

### 92 **Table 1 Main steps in the Modified Delphi exercise**

---

**Expert panel (01/11/21):** Convened a group of collaborators with expertise in a diverse range of

---

---

professional and disciplinary backgrounds.

---

**Workshop (09/12/21):** Collaborators discussed existing work in health and social inequalities, priority areas and examples of equitable working including what worked well/less well. Initial consensus statements developed, refined, and translated into survey format for prioritisation.

---

**Round 1 (01/03/22):** Respondents (internal collaborators and wider networks in practice and community) individually ranked how important they thought each statement was to prioritise. Average score from all respondents and their individual responses summarised and circulated in a repeat questionnaire.

---

**Round 2 (31/05/2022):** Respondents provided with the option to revise their ranking considering the results from the round 1; individual and average group responses summarised and circulated again with a final, repeat questionnaire.

---

**Round 3 (15/08/2022):** Respondents provided with the option to revise their ranking considering the results from round 2, and informed that this is the final round.

---

**Reaching agreement (08/09/2022):** Three rounds were sufficient to enable an acceptable degree of agreement amongst respondents.

---

93  
94 Collaborators within the Collective working across academia, policy, health and social care, arts and  
95 culture, and community and voluntary organisations in the UK and internationally were identified  
96 through professional networks (growing to 76 members). They were invited to attend an online  
97 workshop, which consisted of small-group discussions in breakout rooms to discuss: their work relevant  
98 to health inequities, priorities for future research and practice, how they have approached the issue of  
99 equity and how it is embedded in partnerships and any learning from prior work or experience, e.g., in

100 terms of attending to inherent power dynamics. The key aim of this initial priority-setting workshop was  
101 to obtain content that would inform the consensus statements for the Delphi consensus process.

102 *Developing the consensus statements and initial survey*

103 We conducted a rapid data gathering exercise involving an online search of websites and resources from  
104 other health equity-based initiatives and comparator organisations nationally and internationally. This  
105 information, and content from the initial workshop relevant to the three HSE Collective domains  
106 (research, education and capacity building, and engagement and advocacy) was collated and  
107 thematically organised by topic. Based on this, we next drafted initial consensus statements (n=23)  
108 arranged under six themes: 1) Intersectional training and education; 2) Challenging language and  
109 narratives; 3) Capacity building; 4) Equitable career pathways; 5) Shifting power; 6) Data accessibility  
110 and transparency. Statements were reviewed to ensure clarity, removing duplicate concepts and/or  
111 refining similar concepts into a single statement, removing unnecessary jargon and assessing  
112 interpretability and accessibility.

113 Next, we developed an online survey which included the initial consensus statements, asking  
114 respondents to score statements in order of priority against a 4-point Likert scale ranging from '1 = not a  
115 priority: we should not pursue this', '2 = low priority: we should pursue this when possible and when  
116 other issues are addressed', '3 = medium priority: we should pursue this after a high priority is  
117 addressed' and '4 = high priority: we should pursue this now'. Each statement also provided the option  
118 to make additional free-text comments relating to the statement's clarity, ideas for how to amend or  
119 change the statement, or other views on the statement. Questions about socio-demographic  
120 characteristics (age group, race, ethnicity, migration status, employment status and sector, sexual  
121 orientation, gender, any religious identification, education level, long-term physical, sensory or mental  
122 impairment, and caring responsibilities) were included to appraise whose voices were being represented

123 among respondents, and to facilitate targeted dissemination to capture a wider variety of perspectives.

124 Given the inclusion of international collaborators, we refined socio-demographic category terminology  
125 to reflect contextual differences.

126 The survey included an embedded information sheet detailing information about data protection,  
127 confidentiality and withdrawal procedures. Before starting the survey, respondents were asked to  
128 complete a consent form, which also asked for their e-mail address and consent to be e-mailed further  
129 survey rounds. Links to the survey and information were sent to existing collaborators, who were invited  
130 to complete it themselves and to share information about the survey and the link with their wider  
131 networks. We particularly asked if they could share with people or groups with lived experience of  
132 health and social inequities and other forms of marginalisation (e.g., via research/staff networks,  
133 advisory groups, personal contacts). Each survey round was open for a one-month period.

#### 134 *Data analysis and further rounds*

135 Using the in-built survey reporting function, aggregate descriptive statistics (i.e., number and  
136 percentage) were captured across socio-demographic items. Next, open-text comments were extracted  
137 and reviewed, revising statements accordingly by rewording, re-ordering, grouping together and  
138 removing statements, leaving 21 revised statements.

139 Statements were circulated again in the same survey format via e-mail for round 2 of the Delphi  
140 exercise. This time, statements were not separated into themes to enable respondents to think about  
141 them independently as standalone items. Each respondent who participated in round 1 received their  
142 original score in addition to the average scores for each statement (i.e., the percentage of respondents  
143 who scored the statement not a priority, low priority, medium priority and high priority). This provided  
144 respondents with the option to re-evaluate their position based on the wider feedback.



145 Round 2 statements and socio-demographic data were analysed and refined in the same way as for  
146 round 1. At this stage, the number of statements were increased to 24, based on the suggestions and  
147 feedback received in the open-text comments. The round 3 survey was developed and disseminated in  
148 the same way, though statements were presented as one list and rearranged so that respondents would  
149 view and appraise them in a different order. Using similar methods to prior approaches (e.g., Mir et al.,  
150 2012), consensus was initially defined as >75% of respondents ranking the statement as either medium  
151 or high priority, and the consensus statements were based on the results of round 3 (the final round of  
152 the Delphi exercise), with some minor amendments to wording of the final prioritised statements where  
153 open text comments asked for greater clarity.

## 154 **Results**

155 A total of 21 collaborators attended the initial workshop including representatives from policy (n=1),  
156 arts and culture (n=4), and voluntary and community sectors (n=4), health and social care (n=3), and  
157 academic researchers (n=9). After developing and disseminating the Delphi survey, a total of 40 people  
158 responded to the round 1 survey. The majority of respondents were aged 25-54 years (83%) and  
159 identified as female (80%), just under half were from minoritised racial or ethnic groups while over a  
160 fifth identified as a sexual minority. Those migrant to the country they currently reside, those identified  
161 with any religion and those with any longstanding mental, physical or sensory impairment each made up  
162 around a third of respondents. Most were employed and had degree-level education or higher. Just  
163 under half were health and social care professionals, with academic researchers comprising over a third  
164 of respondents. Subsequent response rates were n = 28 in round 2, and n = 28 for round 3. Those  
165 responding to rounds 2 and 3 tended to be older and included a greater proportion of academic  
166 researchers than round 1. Round 3 statements and scores are outlined in Table 2, while the final  
167 consensus statements following minor amendments to wording are summarised by topic in Table 3  
168 below.

169 **Table 2 Summary of round 3 statements and scores**

| <b>Consensus statements</b>                                                                                                                                                                                                                                                                                                                                                                                                                   | <b><i>n</i></b> | <b>High<br/>priority<br/>score<br/>(%)</b> | <b>Medium<br/>/ high<br/>priority<br/>score<br/>(%)</b> |
|-----------------------------------------------------------------------------------------------------------------------------------------------------------------------------------------------------------------------------------------------------------------------------------------------------------------------------------------------------------------------------------------------------------------------------------------------|-----------------|--------------------------------------------|---------------------------------------------------------|
| There is a need to advocate for the integration of knowledge about social and structural determinants of health and social inequities (racism, homophobia, transphobia, sexism, ableism, ageism, etc.) in academic and professional training and curricula.                                                                                                                                                                                   | 28              | 82                                         | 100                                                     |
| When explaining health inequities, problems should be traced to social and structural systems of oppression rather than located within affected individuals and communities.<br><br><i>* Social and structural oppression refers to a combination of prejudice and institutional power (manifested in norms, policies, processes, laws etc.) that regularly and consistently discriminates against some groups and benefits other groups)</i> | 28              | 82                                         | 100                                                     |
| Health and social care staff should consider people's intersecting social identities/positions when diagnosing and caring for people, while ensuring that presumptions and stereotypes are not reinforced.                                                                                                                                                                                                                                    | 28              | 64                                         | 100                                                     |
| To foster healthier and more equitable ways of working, the capacity (e.g., time, energy, accessibility) needs of socially excluded groups                                                                                                                                                                                                                                                                                                    | 28              | 61                                         | 100                                                     |

|                                                                                                                                                                                                                                                                                                                                                      |    |    |     |
|------------------------------------------------------------------------------------------------------------------------------------------------------------------------------------------------------------------------------------------------------------------------------------------------------------------------------------------------------|----|----|-----|
| should be considered prior to consultation and it is important to consult with them before designing their participation or involvement.                                                                                                                                                                                                             |    |    |     |
| To ensure fair career progression for socially excluded groups, culture change initiatives are required to improve recruitment, retention and promotion and provide better support in work and learning environments that are traditionally exclusionary/hostile.                                                                                    | 28 | 61 | 93  |
| There is need for higher standards and expectations from funders for inclusive practice within the processes outlined in the above statements, and an acknowledgment that this level of commitment and resources exceeds those linked to traditional/conventional approaches.                                                                        | 28 | 61 | 93  |
| There is a need to develop new, and evaluate and share existing tools, resources and methods which help empower communities and amplify the effectiveness of community engagement.<br><br><i>*Community engagement means involving communities in decision-making and in the planning, design, governance and delivery of projects and services.</i> | 28 | 57 | 100 |
| There is a need to embed monitoring and mechanisms of accountability for senior leadership/management to ensure that Equality, Diversity & Inclusion initiatives result in positive change.                                                                                                                                                          | 28 | 57 | 100 |
| Where possible health inequities research should involve and support peer researchers (people with lived experience of the issues                                                                                                                                                                                                                    | 28 | 57 | 96  |

|                                                                                                                                                                                                                                                                                                               |    |    |    |
|---------------------------------------------------------------------------------------------------------------------------------------------------------------------------------------------------------------------------------------------------------------------------------------------------------------|----|----|----|
| of interest direct and conduct the research) to help ensure it is meaningful and accessible to groups most affected.                                                                                                                                                                                          |    |    |    |
| There is a need to provide stakeholders (e.g., community members/organisations, researchers, policy makers, service designers) with training, resources and skills to recognise existing expertise and skills amongst marginalised communities and to challenge hierarchies within decision-making processes. | 28 | 57 | 93 |
| It is important to understand and explicitly state how narratives, norms, processes and practices systematically benefit advantaged groups, including by focusing health inequities research on privileged as well marginalised groups.                                                                       | 28 | 54 | 96 |
| Staff require appropriate support (e.g., with protected time, resource/tools, encouragement & direction) to help them ensure that their policies, practices and decisions are fair, meet the needs of, and are not inadvertently discriminating against any group(s).                                         | 28 | 50 | 96 |
| To tackle community hesitancy about collaborative research, transparency about data ownership (especially data sovereignty and governance), intellectual property, ethical standards, compensation, accountability mechanisms and the intentions of each stakeholder should be presented from the outset.     | 28 | 50 | 93 |
| There is a need to use a range of types of data and to adapt data presented to specific audiences (e.g., academic, health and social care, and community/voluntary sector) to be most impactful.                                                                                                              | 28 | 50 | 96 |

|                                                                                                                                                                                                                                                                                                                                                                                                                                 |    |    |    |
|---------------------------------------------------------------------------------------------------------------------------------------------------------------------------------------------------------------------------------------------------------------------------------------------------------------------------------------------------------------------------------------------------------------------------------|----|----|----|
| There is a need to amplify and acknowledge resistance, agency and everyday thriving as opposed to resilience and deficit-based perspectives when writing about and working with marginalised communities.                                                                                                                                                                                                                       | 28 | 50 | 89 |
| Methods for enabling community participation and partnership working should be standard elements of research, policy and practitioner training curricula.                                                                                                                                                                                                                                                                       | 28 | 46 | 89 |
| To ensure fair career progression for socially excluded groups, there is a need to develop alternative career pipelines such as apprenticeships, paid internships, professional services secondments and placements, and flexible entry requirements that are equitable, inclusive and shaped around the needs of communities.                                                                                                  | 28 | 46 | 96 |
| There is a need to achieve consensus on a framework underpinning the incorporation of community engagement and participatory approaches into research, policy, and service design.<br><br><i>*This includes issues such as equitable working, trust-building, recognising capacity issues such as fatigue, engaging in reciprocity and sustainability of relations and initiating conversations around power and privilege.</i> | 28 | 43 | 89 |
| There is a need for transparent evaluation of the implementation, monitoring and impact of Equality, Diversity and Inclusion (ED&I) initiatives within health and social care, education, research, funding practices and policymaking.                                                                                                                                                                                         | 28 | 43 | 93 |

|                                                                                                                                                                                                                                                                                                                                          |    |    |     |
|------------------------------------------------------------------------------------------------------------------------------------------------------------------------------------------------------------------------------------------------------------------------------------------------------------------------------------------|----|----|-----|
| To highlight the extent of inequity affecting marginalised groups, there is a need to mandate and/or incentivise collection of standardised & monitor quality of data on social demographics and where possible use finer-grain, more disaggregated categories relevant to local circumstances.                                          | 28 | 43 | 93  |
| Creative productions such as photography, drama, video, and public events are an effective way to document and disseminate evidence on health and social inequities.                                                                                                                                                                     | 28 | 36 | 89  |
| To ensure fair career progression, health and social care employers and research institutions should adopt explicit proactive measures/actions (e.g., which are anti-racism) that are subject to transparent and accountable evaluation and monitoring with clear communication on the consequences of falling short on these standards. | 28 | 32 | 93  |
| Creative mediums should complement traditional scientific methods in research about health and social inequity.                                                                                                                                                                                                                          | 28 | 32 | 86  |
| Opportunities for sharing knowledge and examples of good practice in reducing health inequities should be embedded within and across sectors, including those which are not directly related to healthcare.                                                                                                                              | 28 | 29 | 100 |

170

171 As shown in Table 2, all 24 statements met consensus criteria (>75% scoring as either medium or high  
 172 priority). To allow for further prioritisation and to distinguish between these, we therefore examined the  
 173 proportions scoring each item as a “high” priority only. According to this criterion, only two statements  
 174 met the threshold. Given the more stringent approach, and in line with other published approaches [29],

175 we expanded the threshold to include those items for which >60% scored as high priority  
176 (corresponding to six statements), and those for which over half of respondents scored the statement as  
177 a high priority (a further five statements). By presenting statements against each of these tiers (>75%,  
178 >60% and >50% scored as high priority), we therefore indicate those statements for which the majority  
179 of participants report as high priority.

180 **>75% scored as high priority (n=2)**

181 Two statements in this category referred to increasing knowledge about social and structural  
182 determinants of health in professional training and academic curricula, and to ensure that the causes of  
183 social inequities are understood as resulting from patterns of social and structural power rather than  
184 being located within the affected groups themselves. Open text comments emphasised the need for  
185 help in facilitating such learning, to ensure that it is continually reinforced and not part of mandatory  
186 one-off tick box training. These statements were viewed as overarching and facilitative of other practice-  
187 related consensus statements (e.g., feeding into how health and social care professionals consider  
188 people's intersecting identities when caring for them). Understanding the structural forces that shape  
189 and pattern health and social inequities was perceived to be essential to move away from individualised  
190 approaches to care delivery, service design and public health planning, and to mitigate the harm from  
191 poorly framed health inequities research which problematises those affected.

192 **>60% scored as high priority (n=4)**

193 Linked to the first two statements, the next priority referred to integrating understanding about  
194 structural determinants and social power linked to people's intersecting identities within their approach  
195 to care, while avoiding making assumptions or stereotyping. This approach was seen as important to  
196 correcting the assumptions which underpin many decisions and the resources available for appropriate  
197 treatment, to mitigate the risk of people refusing or opting out of care that is insensitive to different

198 aspects of their identities, and to support a focus on challenging inequities inherent to current ways of  
199 working.

200 While the first three emphasised health and care practices, one statement in this category referred to  
201 the need to attend to norms and cultures shaping workforce and career progression inequities within  
202 institutions/organisations responsible for research and care delivery. The focus on organisational culture  
203 and norms which are exclusionary to people from marginalised groups distinguishes this statement from  
204 a related statement on career progression given lower priority, relating to the need for transparent  
205 evaluation and monitoring of proactive measures mitigating inequity (e.g., which are anti-racism), with  
206 accountability for falling short. Open text comments indicated that the latter was perceived as  
207 insufficient alone, lack of clarity about what such measures should be, and that initiatives should be  
208 intersectional rather than focused on single identities.

209 The two remaining statements focussed on meaningful and equitable involvement of people with lived  
210 experience of social inequities in research, service and policy design, oversight and delivery. They  
211 highlight the importance of involvement that is adequately planned to be considerate of their needs and  
212 adequately resourced in terms of time and funding - with flexibility to account for people's lived reality  
213 rather than adhering to strict timescales. Open text comments emphasised the importance of allowing  
214 sufficient time for involvement and participation, and that without consideration of people's capacity,  
215 time and energy, and adequate remuneration, any community-led initiatives will be seen as serving the  
216 institutions/organisations rather than in their best interests, and thus extractive and counterproductive.

217 **>50% scored as high priority (n=5)**

218 Three of the five statements for which over 50% of respondents scored as high priority also related to  
219 involvement of people with lived experience and expertise in research, service and policy design,  
220 oversight and delivery. Specifically, in developing and sharing tools to support community engagement



221 and community-led initiatives and working equitably with sufficiently supported and resourced peer  
222 researchers adequately supported to take part. Further, one statement emphasised the importance of  
223 training and support for those involved in research and decision making to recognise existing expertise  
224 and skills amongst marginalised communities and to challenge hierarchies within decision-making  
225 processes. Several open text comments indicated that while such efforts are important, they challenged  
226 the idea of academic-led community engagement and empowerment. They emphasised the facilitative  
227 role of the Collective, such that involvement is community-led, while also facilitating health and care  
228 services and organisations to meaningfully involve people with lived experience and expertise  
229 themselves. Comments also emphasised the need for tools or resources to support trauma-informed  
230 engagement practice and to proactively form more equitable partnerships which meaningfully share  
231 power rather than recreate existing power dynamics. Regarding peer-researchers, other considerations  
232 emphasised the need for flexibility in relation to their time and capacity as well as sharing credit for  
233 work undertaken to avoid tokenistic and exploitative involvement.

234 One statement in this category overlapped with statements in the >75% category, emphasising  
235 awareness and acknowledgement of how narratives, norms, processes and practices systematically  
236 benefit advantaged groups. Open text comments suggested that this statement should be considered  
237 alongside other related statements in an overall approach which shifts perspectives towards the  
238 structural and systemic factors creating and maintaining patterns of inequities. This would support  
239 moves away from deficit and damage-centred approaches and help identify points for change within  
240 processes and practices.

241 Finally, the statement referring to the need to embed monitoring and mechanisms of accountability for  
242 senior leadership/management to ensure that Equity, Diversity & Inclusion (ED&I) initiatives result in  
243 positive change, was endorsed by over 50% of respondents. Open text comments supported this  
244 statement but warned against tick box and tokenistic approaches (e.g., online one-off trainings or poorly

245 designed Equity Impact Assessments) that were overly onerous for organisations. One comment  
246 suggested that the impact of ED&I initiatives would be dependent upon accountability frameworks and  
247 the extent to which they were embedded into inspectorates with capacity to sanction (e.g., Ofsted, Care  
248 Quality Commission). Another emphasised the importance of considering how social class intersects  
249 with other forces of oppression and privilege to shape people’s experiences to avoid misleading  
250 representation of progress made (e.g., where greater equity for women was only experienced among  
251 women from affluent backgrounds).

252 Taking these comments into account with minor refinements to wording, and ordering them according  
253 to topic, the final 11 consensus statements are provided in Table 3.

254 *Table 3 Final consensus statements, grouped by topic*

---

***Knowledge and framing of health and social inequities, and incorporation into practice***

---

There is a need to advocate for and facilitate the consistent integration of knowledge about the interplay of structural and social determinants of health and social inequities (racism, homophobia, transphobia, sexism, ableism, ageism, etc.) in academic and professional training and curricula.

---

When explaining health inequities, problems should be traced to social and structural systems of oppression\* rather than located within affected individuals and communities.

---

Health and social care staff should consider people's intersecting social identities/positions when diagnosing and caring for people, without making presumptions and reinforcing stereotypes.

---

It is important to understand and explicitly state how narratives, norms, processes and practices systematically benefit advantaged groups and inhibit change, including by focusing health inequities research on privileged as well marginalised groups.

---

***Community engagement, involvement and peer-led research***

---

To foster healthier and more equitable ways of working, the capacity (e.g., time, energy, accessibility) needs of socially excluded groups should be considered prior to consultation. It is important to consult with them before designing their participation or involvement.

---

There is need for higher standards and expectations from funders for inclusive and equitable practice around community involvement. Also, for funders to acknowledge that the level of commitment, resources, and flexibility needed exceeds those linked to traditional/conventional approaches.

---

There is a need to develop new, and evaluate and share existing tools, resources and methods which help communities to act to address health and social inequities, and to amplify the effectiveness of community engagement.\*\*

---

There is a need to provide researchers, policy makers, commissioners and service providers/designers with training, resources and skills to recognise existing expertise and skills amongst marginalised communities and to challenge hierarchies within decision-making processes.

---

Where possible health inequities research should involve and adequately support peer researchers (people with lived experience of the issues of interest direct and conduct the research) to help ensure research is meaningful and accessible to groups most affected.

---

### ***Organisational culture change***

---

To ensure fair career progression for socially excluded groups, culture change initiatives are required to improve recruitment, retention and promotion. This includes providing better support in work and learning environments that are traditionally exclusionary/hostile.

---

There is a need to embed monitoring and mechanisms of accountability for senior leadership/management to ensure that Equity, Diversity & Inclusion initiatives are not tokenistic but result in positive change.

---

255 \* *Social and structural oppression refers to a combination of prejudice and institutional power (manifested in*  
256 *norms, policies, processes, laws etc.) that regularly and consistently discriminates against some groups and benefits*  
257 *other groups)*

258 \*\**Community engagement means involving communities in decision-making and in the planning, design,*  
259 *governance and delivery of projects and services*

260

## 261 **Discussion**

262 We gained majority agreement around eleven statements pertaining to high priority ways of working  
263 within research, education and policy/advocacy that an expert panel identified as priorities for  
264 meaningful change in health inequities. These could be grouped into three main topics: '*Knowledge and*  
265 *framing of health and social inequities, and incorporation into practice*', '*Community engagement,*  
266 *involvement and peer research*', and '*Organisational culture change*'.

267 *Knowledge and framing of health and social inequities*

268 The need to incorporate information about social determinants within health and care professional  
269 training and development has been established [30] with evidence for improved knowledge and  
270 confidence in addressing social determinants [31]. However, the extent to which this has been  
271 implemented is unclear, especially beyond the US context and beyond medical training [31]. Moreover,  
272 it is unclear whether, or the extent to which, such training involves reflexive awareness about how  
273 individual and organisational power operates to influence health and care inequities, with some notable  
274 exceptions [32,33]. Findings suggest that such learning should extend beyond practitioners to include  
275 those training in a broad range of health-related disciplines (e.g., epidemiology, statistics, public health).  
276 In research, there has been increasing awareness of the need to move away from damage-centred and  
277 deficit perspectives (i.e., focusing just on adversity and it's adverse impact on affected groups) in

278 research on health and social inequities [34], and towards approaches which centre thriving, resilience,  
279 resistance and joy (e.g., [35,36]). While this serves to mitigate perpetuating vulnerability and inferiority  
280 narratives which are discriminatory and prejudicial, our statements support calls for research and  
281 practice to go further to explicitly emphasise how social forces of privilege (both historic and  
282 contemporary) actively create, maintain and perpetuate inequities; on the ways in which advantaged  
283 groups keep others in disadvantaged positions and maintain the status quo [18,19,37-39]; and, to take a  
284 social justice perspective [40]. Our statements suggest that such an approach should also be  
285 incorporated into professional training and development in areas relating to social determinants of  
286 health.

#### 287 *Community engagement, involvement and peer research*

288 One definition of community engagement is “a range of approaches to maximise the involvement of  
289 local communities in local initiatives to improve their health and wellbeing and reduce health  
290 inequalities. This includes: needs assessment, community development, planning, design, development,  
291 delivery and evaluation.” [41], p.13). The importance of community engagement and involvement is  
292 increasingly acknowledged, operating on a continuum between consultative (organisation-led) and  
293 empowerment (community-led) approaches (e.g., [20]). However, without adequate resource and  
294 reflexivity they can risk being tokenistic, reinforcing existing power dynamics, creating burnout, and  
295 perpetuating extractive and exploitative relations (e.g., [24, 42]). The statements on these topics were  
296 supplemented by open text comments that highlighted how ‘good practice’ in community engagement  
297 initiatives require adequate time, training, resources, trust, explicit attention to power dynamics, and  
298 honest reflection on how health, care and research institutions drive health inequities through  
299 processes such as racism and (neo)colonialism (e.g., [24, 43-46]). Our statements also support calls for  
300 decision-makers, researchers and care providers to be supported and trained to take up findings from  
301 community-led work and/or to initiate good quality engagement activities [47]. Funders were also called

302 on to take into account of what is needed to support researchers and communities in terms of time,  
303 resource and flexibility in order to avoid constraining engagement activities and perpetuating harm [48].

#### 304 *Organisational culture change*

305 Finally, two of our statements relate to greater equity within organisations in terms of both workforce  
306 (e.g., career progression) and working environment (e.g., related to Equity, Diversity and Inclusion  
307 initiatives). Diversity (e.g., in relation to race and ethnicity) within the caring professions has been linked  
308 to reduced inequalities for those being cared for (e.g., through greater concordance, improved access  
309 and uptake, greater cultural sensitivity)[49]. Inclusion of minoritised groups within the research  
310 community is similarly proposed to help produce research which more effectively addresses health  
311 inequities, for instance, via greater understanding of the needs and challenges of marginalised groups  
312 through shared life experiences, enhancing recruitment and trust in research, adoption of appropriate  
313 research methodologies, and development and implementation of interventions which best meet their  
314 needs [50-52]. Given the engrained and ubiquitous nature of organisational culture operating across  
315 multiple levels (e.g., shared assumptions, norms, values and beliefs), such culture change initiatives are  
316 difficult to implement [53,54]. Our statements emphasise the importance of attending to organisational  
317 culture including transparent monitoring of sustained and accountable mechanisms for identifying and  
318 enacting change, if efforts at recruiting, retaining, and promoting staff from minoritised groups within  
319 health, care, policy and research sectors are to be successful.

320 Areas in which consensus was not achieved may partly reflect the disciplinary backgrounds of  
321 respondents, the majority of whom were health and social care professionals and researchers which is  
322 likely to have shaped the wording, priority and nature of statements. For instance, two statements for  
323 which consensus was not achieved related to use of creative methods for research and dissemination.  
324 Respondents commented that they had a lack of experience with such approaches; however, they also

325 suggested that while creative methods may be an important mechanism of capturing information  
326 shared by people underrepresented in research, they may not be perceived by decision-makers as  
327 sufficiently 'robust', hindering their impact. This suggests that a statement referring to understanding  
328 how and such evidence could be translated into decision-making may have been informative. There is  
329 evidence that arts-based interventions can work in subtle and complex ways to positively influence  
330 knowledge through emotions [55].

331 Further, open-text comments indicated that some of the non-prioritised statements: 1) should already  
332 reflect standard practice (e.g., relating to disseminating research in different formats, giving staff time  
333 and resources to ensure their work is fair and non-discriminatory), and/or 2) are not sufficiently  
334 impactful in themselves, and/or 3) were important but perceived as being downstream of other higher  
335 priority statements. Examples of the latter included statements relating to equitable career pipelines  
336 which are key but priority-wise would follow statements regarding amending organisational culture such  
337 that people are not being recruited into hostile or exclusionary environments. This could be seen as a  
338 circular argument in terms of how culture change might be achieved through better representation of  
339 those from excluded populations and highlights the complex interplay between institutional, community  
340 and individual dynamics [56]. The need to collect and share accurate data was perceived to be necessary  
341 for monitoring and equity impact assessments to be meaningful. Also, before sharing best practice,  
342 respondents highlighted that there is first a need to learn more about best practice from enacting and  
343 learning from other consensus statement-related activities.

344 Comments also suggested caution around statements involving guidance, frameworks, toolkits and so  
345 on, reflective of the fact that people can feel overwhelmed with 'resources'. This may also point to the  
346 need for top-down action on a structural level to mitigate and/or counterbalance the need for  
347 individuals and organisations to take on additional work to address inequities. Finally, several comments  
348 reflected on the extent to which initiatives should be academic-led rather than community or service-

349 led. While the statements are not meant to be read as academic endeavours, this perception may  
350 reflect the organisation of the HSE Collective, in which the Delphi process was organised and led by  
351 academic members, and which may have also influenced engagement with the survey more widely.

### 352 *Strengths and limitations*

353 Our modified Delphi approach successfully gathered perspectives from a range of health and social care  
354 professionals, researchers with expertise across a range of health inequities topics, community  
355 organisation representatives, and a smaller number from policy and arts/culture backgrounds. Our  
356 approach differed from other prioritisation exercises in relation to health inequalities and public health  
357 which focus on agreeing research priorities (e.g., [57-59]). Instead, our statements aim to achieve  
358 consensus on ways of working which will help tackle the inherent structural and social forces within  
359 research, education and engagement/advocacy processes which serve to maintain and perpetuate  
360 inequities in place. The main limitation relates to the range of voices included. While our panel reflected  
361 diversity in relation to race, ethnicity, sexual orientation, migration status, health, and religion, the  
362 majority were educated to degree-level or higher and worked either as health and social care  
363 professionals or academic researchers. While we aimed to broaden the reach of the survey by asking  
364 people to share with their networks it is possible that the wording and approach (online survey) were  
365 exclusionary. Thus, future work involving sustained and in-person engagement to capture the  
366 perspectives of people and groups with lived experience of intersecting forms of social marginalisation  
367 (beyond those within research and health/social care fields), and voluntary and community sector  
368 organisation representatives is needed to extend and refine these priority ways of working. Another  
369 limitation was that only two statements met the 75% threshold, while the remaining nine were included  
370 as scoring high priority for over half of participants. We emphasise that future survey rounds  
371 incorporating a wider breadth of stakeholder representatives are needed to iteratively refine these



372 principles to reach consensus and that this is also appropriate given shifts in social, funding and policy  
373 contexts.

#### 374 *Conclusions*

375 Health inequities persist and are widening despite sustained policy and research attention. The Health &  
376 Social Equity Collective's prioritised statements offer a set of guiding principles for ways of working  
377 within research, education, and engagement/advocacy which would accelerate the pace of change in  
378 addressing health inequities and support the translation of research into practice. These principles  
379 complement initiatives which develop priorities for research topics in health and public health sphere,  
380 attending to how work is done. They have already informed the Collective's approach in developing  
381 applications for research and education initiatives. Given the pressing need to address inequities, the  
382 principles provide a starting ground for future consensus building approaches which incorporate a wider  
383 diversity of perspectives, and to continually update these while integrating learning from health equity  
384 initiatives nationally and internationally such as the Accelerating City Equity Initiative [60]. Given the  
385 need to be contextually relevant and sensitive similar approaches could be taken in other geographic  
386 and social contexts to inform health inequalities practice.

#### 387 **Acknowledgements**

388 We thank members of the Health and Social Equity Collective for supporting its co-design and for their  
389 involvement in creating these guiding principles, to maintain anonymity in this research we have not  
390 named Collective members individually. This paper represents independent research carried out by the  
391 Health and Social Equity Collective which received funding from the King's Together initiative (King's  
392 College London) and from Impact on Urban Health. S. L. H. and J.O. are part-funded by the NIHR  
393 Biomedical Research Centre at South London and Maudsley NHS Foundation Trust. C.W., and S.L.H. are

394 supported by the ESRC Centre for Society and Mental Health at King's College London (ESRC Reference:  
395 ES/S012567/1). The views expressed are those of the author(s) and not necessarily those of the funders.

## 396 **References**

397 1 The King's Fund. Health inequalities: our position. 2021. Available from:

398 <https://www.kingsfund.org.uk/projects/positions/health-inequalities>

399 2 Finch D, Tinson A. The continuing impact of COVID-19 on health and inequalities. Health Foundation.

400 2022. Available from: <https://www.health.org.uk/publications/long-reads/the-continuing-impact-of->

401 [covid-19-on-health-and-](https://www.health.org.uk/publications/long-reads/the-continuing-impact-of-covid-19-on-health-and-)

402 [inequalities#:~:text=A%20year%20on%20from%20publication,first%20year%20of%20the%20pandemic](https://www.health.org.uk/publications/long-reads/the-continuing-impact-of-covid-19-on-health-and-inequalities#:~:text=A%20year%20on%20from%20publication,first%20year%20of%20the%20pandemic)

403 3 Kapadia D, Zhang J, Salway S, Nazroo J, Booth A, Villarroel-Williams N, Becares L, Esmail A. Ethnic

404 inequalities in healthcare: a rapid review. NHS Race & Health Observatory. 2021. Available from:

405 <https://www.nhsrho.org/research/ethnic-inequalities-in-healthcare-a-rapid-evidence-review-2/>

406 4 Irizar P, Pan D, Kapadia D, Bécares L, Sze S, Taylor H, Amele S, Kibuchi E, Divall P, Gray LJ, Nellums LB.

407 Ethnic inequalities in COVID-19 infection, hospitalisation, intensive care admission, and death: a global

408 systematic review and meta-analysis of over 200 million study participants. *EClinicalMedicine*. 2023 Mar

409 6.

410 5 Smith K. Institutional filters: The translation and re-circulation of ideas about health inequalities within

411 policy. *Policy & Politics*. 2013 Jan;41(1):81-100.

412 6 Smith KE. The politics of ideas: The complex interplay of health inequalities research and policy. *Sci*

413 *Public Policy*. 2014 Oct 1;41(5):561-74.

414 7 Smith KE, Hill SE, Bambra C, editors. *Health inequalities: critical perspectives*. Oxford University Press;

415 2016.

- 416 8 Garthwaite K, Smith KE, Bamba C, Pearce J. Desperately seeking reductions in health inequalities:  
417 perspectives of UK researchers on past, present and future directions in health inequalities research.  
418 *Sociol Health Illn.* 2016 Mar;38(3):459-78.
- 419 9 Stoll N, Yalipende Y, Byrom NC, Hatch SL, Lempp H. Mental health and mental well-being of Black  
420 students at UK universities: a review and thematic synthesis. *BMJ Open.* 2022 Feb 1;12(2):e050720.
- 421 10 Nazroo JY, Bhui KS, Rhodes J. Where next for understanding race/ethnic inequalities in severe mental  
422 illness? Structural, interpersonal and institutional racism. *Sociol Health Illn.* 2020 Feb;42(2):262-76.
- 423 11 Rhead RD, Chui Z, Bakolis I, Gazard B, Harwood H, MacCrimmon S, Woodhead C, Hatch SL. Impact of  
424 workplace discrimination and harassment among National Health Service staff working in London trusts:  
425 results from the TIDES study. *BJPsych Open.* 2021 Jan;7(1):e10.
- 426 12 Stopforth S, Kapadia D, Nazroo J, Bécares L. The enduring effects of racism on health: Understanding  
427 direct and indirect effects over time. *SSM Popul Health.* 2022 Sep 1;19:101217.
- 428 13 Razai MS, Majeed A, Esmail A. Structural racism is a fundamental cause and driver of ethnic  
429 disparities in health. *BMJ.* 2021 Apr 12;373.
- 430 14 Yearby R. Structural racism and health disparities: Reconfiguring the social determinants of health  
431 framework to include the root cause. *J Law Med Ethics.* 2020;48(3):518-26.
- 432 15 Yearby R, Lewis C, Gibson C. Incorporating Structural Racism, Employment Discrimination, and  
433 Economic Inequities in the Social Determinants of Health Framework to Understand Agricultural Worker  
434 Health Inequities. *Am J Pub Health.* 2023 Jan;113(S1):S65-71.
- 435 16 Wellcome Monitor. Anxiety, Confusion and Distrust: How BAME People in Britain Have Had a Worse  
436 Experience of the COVID-19 Pandemic. Wellcome Trust. 2020. Available from:  
437 <https://wellcome.org/sites/default/files/wellcome-monitor-2020-covid-19-summary.pdf>

- 438 17 Ryde J. White privilege unmasked: How to be part of the solution. Jessica Kingsley Publishers; 2019  
439 Mar 21.
- 440 18 Hatzenbuehler ML, Phelan JC, Link BG. Stigma as a fundamental cause of population health  
441 inequalities. Am J Pub Health. 2013 May;103(5):813-21.
- 442 19 Link BG, García SJ. Diversions: how the underrepresentation of research on advantaged groups leaves  
443 explanations for health inequalities incomplete. J Health Soc Behav 2021 Sep;62(3):334-49.
- 444 20 O'Mara-Eves A, Brunton G, McDaid G, Oliver S, Kavanagh J, Jamal F, Matosevic T, Harden A, Thomas J.  
445 Community engagement to reduce inequalities in health: a systematic review, meta-analysis and  
446 economic analysis. Public Health Res. 2013;1(4).
- 447 21 Baxter S, Barnes A, Lee C, Mead R, Clowes M. Increasing public participation and influence in local  
448 decision-making to address social determinants of health: a systematic review examining initiatives and  
449 theories. Local Gov Stud. 2022 Jun 15:1-27.
- 450 22 Popay J, Whitehead M, Carr-Hill R, Dibben C, Dixon P, Halliday E, Nazroo J, Peart E, Povall S, Stafford  
451 M, Turner J. The impact on health inequalities of approaches to community engagement in the New  
452 Deal for Communities regeneration initiative: a mixed-methods evaluation. Available from:  
453 <https://europepmc.org/article/nbk/nbk321028>
- 454 23 Chan G. Participatory Visions: "It's not about empowering people, it's about holding space..." 2023.  
455 Available from: [https://www.coproductioncollective.co.uk/news/participatory-visions-its-not-about-empowering-people-its-about-holding-](https://www.coproductioncollective.co.uk/news/participatory-visions-its-not-about-empowering-people-its-about-holding-space?utm_source=Bloomsbury%20Theatre&utm_medium=email&utm_campaign=3286565_Co-production%20Newsletter%20May%202023&utm_content=Participatory%20Visions&dm_i=2HJW,1YFX)  
456 [space?utm\\_source=Bloomsbury%20Theatre&utm\\_medium=email&utm\\_campaign=3286565\\_Co-](https://www.coproductioncollective.co.uk/news/participatory-visions-its-not-about-empowering-people-its-about-holding-space?utm_source=Bloomsbury%20Theatre&utm_medium=email&utm_campaign=3286565_Co-production%20Newsletter%20May%202023&utm_content=Participatory%20Visions&dm_i=2HJW,1YFX)  
457 [production%20Newsletter%20May%202023&utm\\_content=Participatory%20Visions&dm\\_i=2HJW,1YFX](https://www.coproductioncollective.co.uk/news/participatory-visions-its-not-about-empowering-people-its-about-holding-space?utm_source=Bloomsbury%20Theatre&utm_medium=email&utm_campaign=3286565_Co-production%20Newsletter%20May%202023&utm_content=Participatory%20Visions&dm_i=2HJW,1YFX)  
458 [H,68063P,6WM5K,1](https://www.coproductioncollective.co.uk/news/participatory-visions-its-not-about-empowering-people-its-about-holding-space?utm_source=Bloomsbury%20Theatre&utm_medium=email&utm_campaign=3286565_Co-production%20Newsletter%20May%202023&utm_content=Participatory%20Visions&dm_i=2HJW,1YFX)  
459 [H,68063P,6WM5K,1](https://www.coproductioncollective.co.uk/news/participatory-visions-its-not-about-empowering-people-its-about-holding-space?utm_source=Bloomsbury%20Theatre&utm_medium=email&utm_campaign=3286565_Co-production%20Newsletter%20May%202023&utm_content=Participatory%20Visions&dm_i=2HJW,1YFX)

- 460 24 Creary N, Okoroji C, Ibison Y, Kogbara L, and Dyer J. Are we there yet? Co-production and Black  
461 Thrive's journey towards race equity in mental health. COVID-19 and Co-production in Health and Social  
462 Care Research, Policy, and Practice. In: Beresford P, Farr M, Hickey G, Kaur M, Ocloo J, Tembo D,  
463 Williams O, editors. COVID-19 and Co-production in health and social care research, policy and practice:  
464 volume 1: the challenges and necessity of co-production. Policy Press; 2021. pp.49-58.
- 465 25 Hsu CC, Sandford BA. The Delphi technique: making sense of consensus. Pract Assess Res Evaluation.  
466 2019;12(1):10.
- 467 26 Jones J, Hunter D. Consensus methods for medical and health services research. BMJ. 1995 Aug  
468 8;311(7001):376.
- 469 27 Mir G, Salway S, Kai J, Karlsen S, Bhopal R, Ellison GT, Sheikh A. Principles for research on ethnicity  
470 and health: the Leeds Consensus Statement. Eur J Public Health. 2013 Jun 1;23(3):504-10.
- 471 28 Snape D, Kirkham J, Preston J, Popay J, Britten N, Collins M, Froggatt K, Gibson A, Lobban F, Wyatt K,  
472 Jacoby A. Exploring areas of consensus and conflict around values underpinning public involvement in  
473 health and social care research: a modified Delphi study. BMJ Open. 2014 Jan 1;4(1):e004217.
- 474 29 Diamond IR, Grant RC, Feldman BM, Pencharz PB, Ling SC, Moore AM, Wales PW. Defining consensus:  
475 a systematic review recommends methodologic criteria for reporting of Delphi studies. J Clin Epidemiol.  
476 2014 Apr 1;67(4):401-9.
- 477 30 National Academies of Sciences, Engineering, and Medicine. A framework for educating health  
478 professionals to address the social determinants of health. 2016. The National Academies Press.
- 479 31 Hunter K, Thomson B. A scoping review of social determinants of health curricula in post-graduate  
480 medical education. Can Med Educ J. 2019 Jul;10(3):e61.

- 481 32 Salway S, Piercy H, Chowbey P, Brewins L, Dhoot P. Improving capacity in ethnicity and health  
482 research: report of a tailored programme for NHS Public Health practitioners. *Prim Health Care Res Dev*.  
483 2013 Oct;14(4):330-40.
- 484 33 South London & Maudsely NHS Foundation Trust. Anti-Racism Action Plan. 2023. Available from:  
485 <https://slam.nhs.uk/anti-racism>
- 486 34 Tuck E. Suspending damage: A letter to communities. *Harv Educ Rev*. 2009 Sep 1;79(3):409-28.
- 487 35 Robinson BA, Schmitz RM. Beyond resilience: Resistance in the lives of LGBTQ youth. *Sociol Compass*.  
488 2021 Dec;15(12):e12947.
- 489 36 Bryant J, Bolt R, Botfield JR, Martin K, Doyle M, Murphy D, Graham S, Newman CE, Bell S, Treloar C,  
490 Browne AJ. Beyond deficit: 'strengths-based approaches' in indigenous health research. *Sociol Health*  
491 *Illn*. 2021 Jul;43(6):1405-21.
- 492 37 Crenshaw, KW. "Demarginalizing the Intersection of Race and Sex: A Black Feminist Critique of  
493 Antidiscrimination Doctrine, Feminist Theory and Antiracist Politics." *University of Chicago Legal Forum*  
494 1989:139-67.
- 495 38 Collins PH. Intersections of race, class, gender, and nation: Some implications for Black family studies.  
496 *J Comp Fam Stud*. 1998 Mar 1;29(1):27-36.
- 497 39 Woodhead C, Onwumere J, Rhead R, Bora-White M, Chui Z, Clifford N, Connor L, Gunasinghe C,  
498 Harwood H, Meriez P, Mir G. Race, ethnicity and COVID-19 vaccination: a qualitative study of UK  
499 healthcare staff. *Ethn Health*. 2022 Oct 3;27(7):1555-74.
- 500 40 Rogers J, Kelly UA. Feminist intersectionality: Bringing social justice to health disparities research.  
501 *Nurs Ethics*. 2011 May;18(3):397-407.

- 502 41 National Institute for Health and Care Excellence (NICE). Community engagement: improving health  
503 and wellbeing and reducing health inequalities. 2016. Available from:  
504 <https://www.nice.org.uk/guidance/ng44>
- 505 42 Carlisle S. Tackling health inequalities and social exclusion through partnership and community  
506 engagement? A reality check for policy and practice aspirations from a Social Inclusion Partnership in  
507 Scotland. *Crit Public Health*. 2010 Mar 1;20(1):117-27.
- 508 43 Putland C, Baum F, Ziersch A, Arthurson K, Pomagalska D. Enabling pathways to health equity:  
509 developing a framework for implementing social capital in practice. *BMC Public Health*. 2013  
510 Dec;13(1):1-2.
- 511 44 Cyril S, Smith BJ, Possamai-Inesedy A, Renzaho AM. Exploring the role of community engagement in  
512 improving the health of disadvantaged populations: a systematic review. *Glob Health Action*. 2015 Dec  
513 1;8(1):29842.
- 514 45 Gerlach AJ, Browne AJ, Greenwood M. Engaging Indigenous families in a community-based  
515 Indigenous early childhood programme in British Columbia, Canada: A cultural safety perspective.  
516 *Health Soc Care Community*. 2017 Nov;25(6):1763-73.
- 517 46 Kegler MC, Wolff T, Christens BD, Butterfoss FD, Francisco VT, Orleans T. Strengthening our  
518 collaborative approaches for advancing equity and justice. *Health Education & Behavior*. 2019  
519 Oct;46(1\_suppl):5S-8S.
- 520 47 Ortiz K, Nash J, Shea L, Oetzel J, Garoutte J, Sanchez-Youngman S, Wallerstein N. Partnerships,  
521 processes, and outcomes: A health equity–focused scoping meta-review of community-engaged  
522 scholarship. *Annu Rev Public Health*. 2020 Apr 1;41:177-99.

- 523 48 Sprague L, Afifi R, Ayala G, El-Nasoor ML. Participatory praxis as an imperative for health-related  
524 stigma research. *BMC Med.* 2019 Dec;17:1-8.
- 525 49 Williams SD, Hansen K, Smithey M, Burnley J, Koplitz M, Koyama K, Young J, Bakos A. Using social  
526 determinants of health to link health workforce diversity, care quality and access, and health disparities  
527 to achieve health equity in nursing. *Public Health Rep.* 2014 Jan;129(1\_suppl2):32-6.
- 528 50 Valentine HA, Davis AF. Workforce diversity and capacity building to address health disparities. *Sci*  
529 *Health Dispar Res.* 2021 Feb 12:445-54.
- 530 51 Yanagihara R, Berry MJ, Carson MJ, Chang SP, Corliss H, Cox MB, Haddad G, Hohmann C, Kelley ST,  
531 Lee ES, Link BG. Building a diverse workforce and thinkforce to reduce health disparities. *Int. J. Environ.*  
532 *Res. Public Health.* 2021 Feb;18(4):1569.
- 533 52 Chaudhuri KR, Podlewska A, Lau YH, Gonde C, McIntosh A, Qamar MA, O'Donoghue S, Larcombe K,  
534 Adeeko M, Gupta A, Bajwah S. Addressing the gap for racially diverse research involvement: the King's  
535 Model for Minority Ethnic Research Participant Recruitment ([doi.org/10.21203/rs.3.rs-2374782/v1](https://doi.org/10.21203/rs.3.rs-2374782/v1)).
- 536 53 Scott TI, Mannion R, Davies HT, Marshall MN. Implementing culture change in health care: theory and  
537 practice. *Int J Qual Health Care.* 2003 Mar 1;15(2):111-8.
- 538 54 Mannion R, Davies H. Understanding organisational culture for healthcare quality improvement. *BMJ.*  
539 2018 Nov 28;363.
- 540 55 Parsons J, Heus, L, Moravac, C. Seeing voices of health disparity: Evaluating arts projects as influence  
541 processes. *Eval Program Plan.* 2013 36(1), pp.165-171.
- 542 56 Mir G, Karlsen S, Mitullah WV, Bhojani U, Uzochukwu B, Okeke C, Mirzoev T, Ebenso B, Dracup N,  
543 Dymiski GA, Duong DT. Achieving SDG 10: a global review of public service inclusion strategies for ethnic



544 and religious minorities. UNRISD Occasional Paper-Overcoming Inequalities in a Fractured World:  
545 Between Elite Power and Social Mobilization; 2020.

546 57 Turner S, Ollerhead E, Cook A. Identifying research priorities for public health research to address  
547 health inequalities: use of Delphi-like survey methods. Health Res Policy Syst. 2017 Dec;15(1):1-0.

548 58 Addison M, Kaner E, Johnstone P, Hillier-Brown F, Moffatt S, Russell S, Barr B, Holland P, Salway S,  
549 Whitehead M, Bamba C. Equal North: how can we reduce health inequalities in the North of England? A  
550 prioritization exercise with researchers, policymakers and practitioners. J Public Health. 2019 Dec  
551 20;41(4):652-64.

552 59 Taylor A, McMellon C, French T, MacLachlan A, Evans R, Lewis R, McCann M, Moore L, Murphy S,  
553 Simpson S, Inchley J. Defining research priorities for youth public mental health: reflections on a  
554 coproduction approach to transdisciplinary working. Health Res Policy Syst. 2022 Jun 20;20(1):72.

555 60 International Society for Urban Health. Accelerating City Equity (ACE) Project. 2023. Available from:  
556 <https://isuh.org/projects/accelerating-city-equity-ace-project/>

557  
558  
559
